# 1 **A plant biodiversity effect resolved to a single genetic locus**

2

3 Samuel E. Wuest<sup>1,2,\*</sup> and Pascal A. Niklaus<sup>2</sup>

4

5 1) Department of Plant and Microbial Biology and Zurich-Basel Plant Science Center, University of  
6 Zurich, Zollikerstrasse 107, 8008 Zurich

7 2) Department of Evolutionary Biology and Environmental Studies and Zurich-Basel Plant Science  
8 Center, University of Zurich, Winterthurerstrasse 190, 8057 Zurich

9

10 \*correspondence to: Samuel E. Wuest ([samuel.wuest@ieu.uzh.ch](mailto:samuel.wuest@ieu.uzh.ch))

## 11 **Summary**

12 There is now pervasive evidence of positive effects of biodiversity on plant community productivity  
13 and functioning<sup>1,2</sup>. Although some advances have been made linking diversity effects to functional  
14 trait variation<sup>3</sup>, progress towards a mechanistic understanding remains slow<sup>4</sup> - in part because  
15 biodiversity effects are emergent complex properties of communities, and mechanisms might differ  
16 between communities or environmental conditions<sup>5</sup>. Without a mechanistic understanding, however,  
17 the advancement of ecological theory as well as applications in agriculture are impeded. Here, we  
18 analyse non-additive interactions between divergent *Arabidopsis* accessions in experimental plant  
19 communities. By combining concepts and designs from ecology and plant breeding with genetic  
20 methods, we have identified a major effect locus at which allelic diversity promotes community  
21 productivity. In further experiments with near-isogenic lines, this diversity effect locus was resolved  
22 to a single region representing less than 0.3% of the genome. Using plant-soil-feedback  
23 experiments, we demonstrate that allelic diversity causes genotype-specific soil legacy responses in  
24 a subsequent plant generation. This suggests that asymmetric interactions of plants with soil-borne  
25 factors drive niche complementarity and that the impacts of allelic diversity can extend across  
26 generations. In summary, this work shows that positive diversity effects can be linked to single  
27 Mendelian factors, and that complex community properties can have simple causes. This may pave  
28 the way to novel breeding strategies, which focus on phenotypic properties that do not manifest  
29 themselves at the individual level, but only at a higher level of biological organisation.

30

## 31 **Main Text**

32 More than two decades of plant ecological research and the publication of hundreds of studies have  
33 firmly established that positive biodiversity effects, in particular on community yield, are the rule  
34 rather than exception and are often substantial<sup>1,2</sup>. These effects have been explained by larger  
35 community-level resource use promoted by niche complementarity, and by reduced negative

36 density-dependent effects of enemies<sup>6,7</sup>. Yet, our understanding of the particular driving  
37 mechanisms remains poor, for several reasons. First, diversity effects are emergent properties that  
38 only manifest in comparisons of communities differing in diversity<sup>8</sup>. Second, diversity effects, and  
39 the mechanisms that drive these, may change with environmental conditions<sup>5,9</sup>. Third, while there is  
40 no doubt that functional trait differences underly biodiversity effects<sup>10</sup>, trait-based analyses remain  
41 to some degree phenomenological because evolutionary forces have led to the formation of trait  
42 syndromes, i.e. to sets of highly correlated traits that reflect fundamental trade-offs between  
43 ecological strategies<sup>11,12</sup>. The observed variation in traits thus is confounded with phylogeny<sup>13</sup>, and it  
44 remains almost impossible to distinguish the traits that are true drivers of biodiversity effects from  
45 traits that are merely correlated. Our still poor mechanistic understanding of biodiversity effects  
46 impedes the development of predictive ecological theory and their implementation in, for example,  
47 agricultural applications.

48

49 Most biodiversity research to date has focused on variation among species, but experimental<sup>14</sup>,  
50 theoretical<sup>15</sup>, and observational<sup>16</sup> studies have shown that positive diversity effects on productivity  
51 also occur at levels of organization above and below species. An important part of the trait variation  
52 apparent in plant communities occurs within species<sup>17</sup>, and increased intra-specific variation can  
53 have similar effects as inter-specific trait variation in low-diversity systems<sup>14,18,19</sup>. Despite  
54 qualitative differences, there may therefore be commonalities of trait variation within and between  
55 species with respect to effects and mechanisms, indicating that studies at the genotype level may  
56 provide some insights into effects of species-level variation and vice versa. A methodological  
57 advantage of intra-specific biodiversity studies is that genetic methods can circumvent some of the  
58 problems encountered in species-level diversity studies. Specifically, crosses between genotypes  
59 allow trait variation between individuals to be re-arranged<sup>20</sup> without confounding with population

60 structure or the differentiation into ecological strategies. However, genetic approaches are normally  
61 used to study properties of individuals rather than emergent properties of communities.

62

63 Here, we demonstrate in a case study how the genetic approach can be harnessed to identify the  
64 genetic underpinnings of biodiversity effects. By screening pair-wise mixtures of divergent natural  
65 accessions of *Arabidopsis thaliana*, we identified two accessions, Bayreuth (Bay) and Shadhara  
66 (Sha), that exhibit positive net biodiversity effects when grown together, i.e. mixtures produce a  
67 higher community-level biomass than the average of their monocultures (Fig. 1a). This effect  
68 depended on soil conditions, with effects that were essentially absent on peat-rich soil but grew to  
69 an overyielding of 16% with increasing amounts of sand in the substrate (sand content  $\times$  diversity:  
70  $F_{1,160} = 4.57$ ,  $P < 0.05$ ; Fig. 1b and Extended Data Fig. S1a). Analysis by additive  
71 partitioning<sup>8</sup> revealed that these community-level biodiversity effects were due to complementarity  
72 rather than selection effects (sand content  $\times$  complementarity effect,  $F_{1,77} = 7.21$ ,  $P < 0.01$ ; Extended  
73 Data Fig. S1b); specifically, this indicates that both ecotypes benefited from growing in mixed  
74 communities.

75

76 To analyse the genetic basis of the positive diversity effect in mixed Bay-Sha communities, we  
77 performed quantitative trait locus (QTL) mapping using publicly available recombinant inbred lines  
78 (RILs). These RILs are largely homozygous (Fig. 1c) and have been derived from a cross between  
79 the Bay and Sha accessions, followed by multiple subsequent rounds of inbreeding<sup>21</sup>. For efficient  
80 mapping, we capitalized on a so called competition diallel. Traditional diallel designs systematically  
81 cross parental lines and are used in breeding to determine the genetic basis of traits; specifically,  
82 diallel analysis partitions the traits of crosses into additive contributions<sup>22</sup> of parental lines (general  
83 combining abilities; GCA) and cross-specific effects (specific combining abilities; SCA), with the  
84 latter interpreted as consequences of dominance or epistasis. By substituting individuals and crosses



85 with communities and mixtures, the principle of diallels can be applied to the analyses of  
86 biodiversity effects in communities<sup>23</sup>, which we did here (Fig. 1c, d). In this context, the distinction  
87 between maternal and paternal effects ceases to apply, simplifying the design to a half-diallel. SCAs  
88 then quantify the deviations of mixture yields from expectations based on additive average  
89 contributions of the two genotypes. We combined 18 RILs and the two parental accessions Bay and  
90 Sha, in four replicate blocks, on sand-rich soil. We detected significant positive genotype diversity  
91 effects (Fig. 2a,  $F_{1,189} = 10.47$ ,  $P < 0.01$ ), indicating that the traits that promote biodiversity effects are  
92 heritable. As expected, a large proportion of the variation in SCA remained unexplained. We  
93 therefore tested for allelic diversity effects on SCAs at 69 marker positions. Both a marker  
94 regression technique and a standard QTL procedure revealed a major effect locus on the lower arm  
95 of chromosome four where allelic diversity at the community level resulted in higher SCAs (Fig. 2b  
96 and Extended Data Fig. S2).

97

98 With 18 recombinant lines, mapping resolution was limited and other effect loci or genetic  
99 interactions among loci may have gone unnoticed. We thus aimed at resolving the allelic diversity  
100 effect further to a single Mendelian factor. For this, we isolated a family of 19 near isogenic lines  
101 (NILs) that genetically varied only on the lower arm of chromosome 4, and in which we selected  
102 and inferred further recombination events by molecular markers and whole-genome re-sequencing  
103 (Fig. 3a,b, Extended Data Fig. S3). With these NILs, we performed a second diallel experiment,  
104 replicated once on peat-rich soil where we expected no diversity effects and once on sand-rich soil  
105 where we expected positive diversity effects. Indeed, no locus was associated with positive allelic  
106 diversity effects on peat-rich soil (Fig. 3c). In contrast, we found a positive allelic diversity effects  
107 at a single locus (overyielding of 4.5%, Fig. 3d,  $P < 0.01$ ), represented by a region of approx. 310  
108 kb in size (termed locus Chr4@16.92: between 16.92 to 17.23 Mb). Overall, two subsequent  
109 competition diallel experiments using only 37 recombinant lines were sufficient to resolve a plant

110 biodiversity effect to a genomic region representing ~2.5% of the Arabidopsis genome (containing  
111 approx. 86 genes), which emphasizes the extreme efficiency of our approach. The overyielding of  
112 allelic mixtures of otherwise isogenic lines was transgressive, i.e. allelic mixtures in the NIL diallel  
113 produced more biomass than the best mono-allelic communities ( $t = 2.32$ ;  $P = 0.02$ ). Transgressive  
114 overyielding is generally accepted as evidence of diversity effects that are driven by niche  
115 complementarity. Our work thus suggests that niche complementarity between genotypes can  
116 ultimately be attributed to diversity at discrete hereditary units.

117

118 Interactions between plant and soil factors have been invoked to explain productivity responses in  
119 plant biodiversity experiments<sup>6,7,24</sup>, and the increase in biodiversity effects with time<sup>25</sup>. To test for  
120 soil-borne effects of allelic diversity on the growth of subsequent generations of plants, we  
121 performed soil feedback experiments with soil from both diallels, i.e. we grew phytometers<sup>26</sup> on soil  
122 pre-conditioned (“trained”) by the growth of the specific genotype combinations (Fig. 1d and  
123 Supplementary Discussion). These phytometers were the two parental accessions Bay or Sha for the  
124 RIL diallel, and two near-isogenic lines in the NIL diallel. We found phytometer-specific soil  
125 legacy responses that depended on the allelic diversity of the communities that had conditioned the  
126 soils (Fig. 4; RIL diallel: diversity at marker MSAT4.9 × phytometer;  $F_{1,166} = 6.48$ ;  $P = 0.012$ ; NIL  
127 diallel: diversity at locus Chr4@16.92 × phytometer;  $F_{1,168} = 5.61$ ;  $P = 0.02$ ; Extended Data Table  
128 S1; Extended Data Fig. S4). Importantly, these phytometer-specific responses to soil legacy were  
129 independent of differences in previous community productivity and associated resource depletion  
130 (the effects remained statistically significant and comparable in size when first adjusting for  
131 community biomass in linear models). Interestingly, legacy effects of plants bearing the Bay allele  
132 differed in the experiments with RILs and NILs. This indicates that genotypes with the Bay allele in  
133 both cases strongly conditioned soils and drove subsequent legacy effects. However, and not  
134 unexpectedly given the complexity of mechanisms involved, these allele-specific effects cannot be

135 understood in isolation but depend on environmental conditions or genetic context (Supplementary  
136 Discussion). Developing a full understanding of the biological mechanisms at play will thus require  
137 further experiments, including soil analyses. Yet, our experiments demonstrate that plant genotype  
138 interactions mediated through allelic diversity at a single locus extend their effects across  
139 generations through their soil legacy. We were intrigued to find that we could in principle have  
140 genetically mapped this allelic diversity effect solely through its soil legacy; in other words, by  
141 QTL mapping an extended phenotypic property of allelic mixtures (Extended Data Fig. S4e,f;  
142 Supplementary Discussion).

143

144 Our study is, to the best of our knowledge, the first to systematically resolve biodiversity effects to  
145 their genetic origin. So far, complex emergent properties of plant communities did not necessarily  
146 seem genetically tractable, especially since quantitative traits of individuals often are polygenic<sup>27</sup> if  
147 not omnigenic in nature<sup>28</sup>. A single case study obviously is limited with respect to generalizations,  
148 but we consider it possible that in many cases complementarity and resulting biodiversity effects  
149 might instead have a relatively simple genetic architecture – a feature not uncommon for other types  
150 of biotic interactions<sup>29</sup>. Our genetic approach is extensible to the study of interactions among other  
151 genotype combinations and, with modifications, among species, and could thus lead to fundamental  
152 new insights into the traits and genetic underpinnings of biodiversity effects in more natural  
153 systems. Equally importantly, the genetic tractability of such effects may allow efficient breeding of  
154 genotype mixtures that support increased yields through niche complementarity while maintaining  
155 low variation in economically relevant traits. Biodiversity effects have received relatively little  
156 attention in breeding and conventional agriculture, with the notable exception of crop rotation<sup>30</sup> and  
157 intercropping of cultivars and species<sup>31–33</sup>. Instead, sustaining a growing global human population  
158 heavily depends on increasing nutrient inputs to crop production systems<sup>34</sup>, on breeding of single  
159 genotypes for monoculture performance<sup>35</sup>, and on the use of within-individual diversity effects

160 termed heterosis<sup>36</sup>. Our approach might help bypass constraints imposed on the performance of  
161 single genotypes, by shifting breeding efforts from the individual to the system level<sup>37</sup>.

162

## 163 **Methods**

### 164 Germplasm

165 The Shadhara and Bayreuth accessions were kindly provided by Nuno Pires (University of Zurich)  
166 and had originally been obtained from the Nottingham Arabidopsis stock center (NASC). The 18  
167 RILs (representing the “RIL-minimal set” and line 33RV191 used to generate NILs (all contained in  
168 the core-pop set of 165 lines) were ordered from the Versailles Arabidopsis stock center  
169 (<http://publiclines.versailles.inra.fr>) and propagated in a growth chamber. A Bay×Sha RIL  
170 (33RV191) was confirmed to be heterozygous at two PCR marker positions on chromosome 4  
171 (Table S2). Upon selfing of this line, the two NILs 33RV191-Sha and 33RV191-Bay were isolated,  
172 and their genomes were re-sequenced as described below. Furthermore, after selfing of another  
173 single heterozygous F<sub>10</sub> individual of line 33RV191, we screened 160 offspring for recombination  
174 between the ShaBa5, ShaBa6 and ShaBa8 markers on chromosome four. Upon selfing of 23  
175 putative recombinant offspring, we isolated 19 homozygous recombinant lines for which we  
176 confirmed a recombination event in the region by PCR. We then performed whole-genome re-  
177 sequencing to confirm the isogenic background and to infer recombination breakpoints for this  
178 heterogeneous inbred family (referred to as NILs throughout the text) as described below.

179

### 180 Soils and growth conditions

181 Soils consisted of different mixtures of a peat and nutrient rich soil (Einheitserde ED73; pH ~5.8, N  
182 250 mg L<sup>-1</sup>; P<sub>2</sub>O<sub>5</sub> 300 mg L<sup>-1</sup>; 75% organic matter content; Gebrüder Patzer GmbH, Sinntal-Jossa,  
183 Germany) and finely grained quartz sand. Pot for all mixture experiments were 7×7×8 cm in size.  
184 The experiment using the parental lines Bay and Sha was replicated on a soil quality gradient with

185 sand contents of 0%, 40%, 75% and 80%, which resulted in a near-linear decrease of pot-  
186 productivity from the highest to lowest ED73 content (Fig. S1). For the rough-mapping of the  
187 diversity effect using RILs, we used a mixture of 80% sand and 20% ED73. For the fine-mapping  
188 diallel using NILs, we used either a 80%:20% or a 20%:80% sand:ED73 mixture.

189 Seeds were sown directly onto soils (approx. 10 seeds per position, 4 positions per pot, Fig. 1a).  
190 The pots were placed in growth chambers or greenhouse compartments and covered with plastic  
191 lids to maintain a high humidity for germination and initial seedling establishment. Additional light  
192 was provided if necessary, achieving a photoperiod of 14–16 hours. Day-time and night-time  
193 temperatures were maintained around 20–25 °C and 16–20 °C, respectively. Seedlings were thinned  
194 continuously until a single healthy seedling remained per position.

195 Once seedlings were established, the pots were placed in a greenhouse compartment with automated  
196 watering (every 2 days). In summer 2015, daytime temperatures were extremely high, and the first  
197 block of the RIL competition diallel was therefore grown in a growth chamber with full climate  
198 control (8 h night/16 h day; 60% humidity; 18/23°C night/day temperature). The second block was  
199 grown in the growth chamber for a month before it was re-located to the regular greenhouse  
200 compartment.

201 Pots that did not contain all four originally planted individuals were discarded. Plants were  
202 harvested 43–51 days after sowing, with the specific harvest date determined by the occurrence of  
203 approx. 5–10 dehiscent siliques on the earliest flowering genotypes within a block.

204 After the competition diallels were harvested, soil feedback trials were established by dividing the  
205 soil of a pot into two smaller pots 5.5×5.5×6.0 cm in size. The respective phytometers (Bay or Sha  
206 for the RIL diallel, 33RV191-Sha or 33RV191-Bay for the NIL diallel) were sown directly onto the  
207 soil. Again, seeds were oversown and seedlings thinned continuously until a single healthy individual  
208 remained. Phytometer experiments were harvested either 36 days after sowing (peat-rich soil  
209 remaining after the NIL diallel, harvested early because plant roots started to grow out of the pots)

210 or 49–58 days after sowing (sand-rich soil, each block was harvested on a single day). For all  
211 experiments, the position of the individual pots was randomized across trays during seedling  
212 establishment, and across watering tables after seedling establishment. Throughout the experiment,  
213 pots were re-positioned randomly within trays and tables every 7–10 days. Pots were watered *ad*  
214 *libitum*, and in case of high population densities of dark-winged fungus gnats, the systemic  
215 insecticide ActaraG (Syngenta Agro AG) was applied according to the manufacturers  
216 recommendation. After harvesting, plant biomass was dried at 65°C for at least three days before  
217 weighing.

218

### 219 Experimental designs

220 To test soil effects on biodiversity effects in mixed Shadhara-Bayreuth communities, four soil  
221 substrates varying in sand content were prepared as described above. We then grew 12 replicate  
222 monocultures of each accession plus 24 replicate mixtures per soil type (total of  $48 \times 4 = 192$  pots).

223 The RIL competition diallel consisted of a half diallel replicated in four blocks. All pair-wise RIL  
224 combinations were realized once per block except for RIL monocultures which were replicated  
225 twice. For the follow-up soil feedback experiment, we re-used soil from only the first two blocks of  
226 the competition diallel. We re-mixed the soil of each single pot after harvesting the plants, and re-  
227 distributed it into two smaller plots that were sown with either a Shadhara or Bayreuth parental  
228 genotype that served as phytometers.

229 The NIL competition diallel used for fine-mapping was realized in a single block that contained all  
230 pair-wise combinations of the 19 NILs including monocultures. The subsequent soil feedback stage  
231 was realized as described for the RIL diallel, using either 33RV191-Bay or 33RV191-Sha genotypes  
232 as phytometers.

233

### 234 Genotyping and line re-sequencing

235 PCR-based genotyping assays (Table S2) were developed based on deletions in the Sha genome as  
236 predicted by the Polymorph tool (<http://polymorph.weigelworld.org>)<sup>38</sup>.  
237 Barcoded libraries for genome re-sequencing were prepared using the Illumina Nextera DNA  
238 Library Prep Kit (FC-121-1031, Illumina Inc. San Diego, CA) in combination with the Nextera  
239 Index Kit (96 indices, FC-121-1012) and pair-end sequenced on an Illumina HiSeq 2500 (2x150 bp,  
240 rapid run). The clustering and sequencing were performed at the Functional Genomics Center  
241 Zurich. Sequences were aligned to the Arabidopsis genome (Col-0 genome, TAIR version 10) using  
242 BWA<sup>39</sup>, aligned read sorting and variant calling were performed using samtools<sup>40</sup>. Aligned genomic  
243 sequences of the parental accessions Bay-0 and Sha were downloaded from the 1001 genomes  
244 project data center (<http://1001genomes.org>). The VCF-file produced by the samtools software was  
245 loaded into the R Statistical Software<sup>41</sup>, where the subsequent analyses were performed: variant  
246 calls were filtered (for differences in genotype calls between the Sha and Bay genomes, quality of  
247 variant calls, population-level minimal minor allele frequency 0.2; maximum heterozygosity 0.2).  
248 Inference of genotype calls at polymorphic sites was performed as described previously<sup>42</sup> and  
249 inference of parental alleles was improved using functionality implemented in the MPR package<sup>42</sup>.  
250 Genotype reconstruction was then performed in R using a simple hidden Markov model as  
251 implemented in the R package HMM, with hidden state starting probabilities (Bay, Het or Sha) all  
252 set to 1/3, and transition probabilities from one state to itself set to 0.99998 and to the other two  
253 states set to 0.00001 each. Emission probabilities of genotype calls given a state, e.g. Bay, were set  
254 to 0.35, 0.25, 0.25, 0.15 for genotypes calls Bay, Het, Sha or missing, etc.

255

## 256 Statistical analyses

257 We analyzed data from the diallel experiments using linear mixed models summarized by analysis  
258 of variance (ANOVA). The model terms included, in this order, the general combining abilities  
259 (GCA) of genotypes (a factor with 20 levels in the RIL diallel and 19 levels in the NIL diallel), the



260 genotype diversity in the pot (GD, 1 or 2 genotypes), the allele identity in the genotype  
261 monocultures (A, Sha or Bay), the allelic diversity in the genotype mixtures (AD, 1 [Sha/Sha or  
262 Bay/Bay] or 2 [Sha/Bay]), and the genotype composition planted in the pot (comp). The factor GCA  
263 was created by superimposing the model matrices for factors coding for the first and second  
264 genotype (factors with 20 and 19 levels for RIL and NIL diallels, respectively). The significance of  
265 GD, A, and AD were determined using F-tests with comp as error term (denominator). A and AD  
266 were encoded in such a way that these contrasts applied only to genotype monocultures and  
267 mixtures, respectively. Technically, this was achieved by including a third level in the factor that did  
268 not vary in the other group. Fitting A and AD after GD therefore only explained variance in these  
269 subsets. The diallel model was extended by additional terms and the corresponding interactions  
270 when these applied; specifically, the RIL diallel included a block effect. The NIL diallel included  
271 terms for soil type, and interactions of all the terms above with soil type (for example, soil×AD was  
272 tested using soil×comp as error term). The soil feedback experiments included further interactions  
273 with phytometer (RIL and NIL diallel), and phytometer×soil (NIL diallel). Effects of pot biomass in  
274 the competition diallel (diallel biomass and diallel biomass × soil) were accounted for in these linear  
275 models, and data were square-root transformed to obtain normally distributed residuals.

276 Specific combining abilities for mapping were calculated directly, within blocks, by solving the  
277 linear model  $m = X GCA + SCA$  where X is the design matrix describing the genotype composition  
278 of a pot. Monoculture SCAs were also determined but not used for QTL mapping of allelic diversity  
279 within RIL mixtures. In the RIL diallel, the SCAs of each genotype composition was first calculated  
280 per block and then aggregated over all blocks using least-square estimates. Marker regression was  
281 performed contrasting SCAs of mono-allelic RIL mixtures (“BB” and “SS” compositions) with  
282 mixed-allelic mixtures (“BS” compositions) using the `glht`-function provided by the `multcomp`  
283 package<sup>43</sup>. QTL mapping was also performed using the `R/qtl` package and interval mapping  
284 (`scanone`-function), with both mono-allelic compositions at a given locus re-coded as to the same



285 level (“mono-allelic”) and compared against mixed-allelic compositions. Genome-wide significance  
286 was assessed by resampling (n=5000).

287

## 288 **References**

- 289 1. Cardinale, B. J. *et al.* The functional role of producer diversity in ecosystems. *Am. J. Bot.* **98**,  
290 572–592 (2011).
- 291 2. O’Connor, M. I. *et al.* A general biodiversity–function relationship is mediated by trophic  
292 level. *Oikos* **126**, 18–31 (2017).
- 293 3. Cadotte, M. W. Functional traits explain ecosystem function through opposing mechanisms.  
294 *Ecology Letters* **20**, 989–996 (2017).
- 295 4. Wright, A. J., Wardle, D. A., Callaway, R. & Gaxiola, A. The Overlooked Role of Facilitation  
296 in Biodiversity Experiments. *Trends in Ecology and Evolution* **32**, 383–390 (2017).
- 297 5. Ratcliffe, S. *et al.* Biodiversity and ecosystem functioning relations in European forests  
298 depend on environmental context. *Ecology Letters* **20**, 1414–1426 (2017).
- 299 6. Schnitzer, S. A. *et al.* Soil microbes drive the classic plant diversity-productivity pattern.  
300 *Ecology* **92**, 296–303 (2011).
- 301 7. Maron, J. L., Marler, M., Klironomos, J. N. & Cleveland, C. C. Soil fungal pathogens and the  
302 relationship between plant diversity and productivity. *Ecol. Lett.* **14**, 36–41 (2011).
- 303 8. Loreau, M. & Hector, A. Partitioning selection and complementarity in biodiversity  
304 experiments. *Nature* **412**, 72–76 (2001).
- 305 9. Tylianakis, J. M. *et al.* Resource heterogeneity moderates the biodiversity-function  
306 relationship in real world ecosystems. *PLoS Biol.* **6**, 947–956 (2008).
- 307 10. Flynn, D. F. B., Mirotchnick, N., Jain, M., Palmer, M. I. & Naeem, S. Functional and  
308 phylogenetic diversity as predictors of biodiversity--ecosystem-function relationships.  
309 *Ecology* **92**, 1573–1581 (2011).
- 310 11. Wright, I. J. *et al.* The worldwide leaf economics spectrum. *Nature* **428**, 821–827 (2004).
- 311 12. Díaz, S. *et al.* The global spectrum of plant form and function. *Nature* **529**, 167–171 (2015).
- 312 13. Cadotte, M. W., Cardinale, B. J. & Oakley, T. H. Evolutionary history and the effect of  
313 biodiversity on plant productivity. *Proc. Natl. Acad. Sci. USA* **105**, 17012–17017 (2008).
- 314 14. Crutsinger, G. M. *et al.* Plant genotypic diversity predicts community structure and governs  
315 an ecosystem process. *Science*. **313**, 966–968 (2006).
- 316 15. Wang, S. & Loreau, M. Ecosystem stability in space:  $\alpha$ ,  $\beta$  and  $\gamma$  variability. *Ecol. Lett.* **17**,  
317 891–901 (2014).

- 318 16. Oehri, J., Schmid, B., Schaeppman-Strub, G. & Niklaus, P. A. Biodiversity promotes primary  
319 productivity and growing season lengthening at the landscape scale. *Proc. Natl. Acad. Sci.*  
320 **38**, 10160–10165 (2017).
- 321 17. Siefert, A. *et al.* A global meta-analysis of the relative extent of intraspecific trait variation in  
322 plant communities. *Ecology Letters* **18**, 1406–1419 (2015).
- 323 18. Crutsinger, G. M., Souza, L. & Sanders, N. J. Intraspecific diversity and dominant genotypes  
324 resist plant invasions. *Ecol. Lett.* **11**, 16–23 (2008).
- 325 19. Prieto, I. *et al.* Complementary effects of species and genetic diversity on productivity and  
326 stability of sown grasslands. *Nat. Plants* **1**, 15033 (2015).
- 327 20. Mendel, G. Versuche über Pflanzenhybriden. in *Verhandlungen des naturforschenden*  
328 *Vereines in Brünn, Band IV für das Jahr 1865* 3–47 (1865).
- 329 21. Loudet, O., Chaillou, S., Camilleri, C., Bouchez, D. & Daniel-Vedele, F. Bay-0 x Shahdara  
330 recombinant inbred line population: A powerful tool for the genetic dissection of complex  
331 traits in Arabidopsis. *Theor. Appl. Genet.* **104**, 1173–1184 (2002).
- 332 22. Griffing, B. Concept of General and Specific Combining Ability in Relation to Diallel  
333 Crossing Systems. *Aust. J. Biol. Sci.* **9**, 463–493 (1956).
- 334 23. Griffing, B. Genetic-Analysis of Plant Mixtures. *Genetics* **122**, 943–956 (1989).
- 335 24. Zak, D. R., Holmes, W. E., White, D. C., Peacock, A. D. & Tilman, D. Plant diversity, soil  
336 microbial communities, and ecosystem function: Are there any links? *Ecology* **84**, 2042–  
337 2050 (2003).
- 338 25. Meyer, S. T. *et al.* Effects of biodiversity strengthen over time as ecosystem functioning  
339 declines at low and increases at high biodiversity. *Ecosphere* **7**, (2016).
- 340 26. Clements, F. E. & Goldsmith, G. W. *The Phytometer Method in Ecology*. (Carnegie  
341 Institution of Washington, 1924).
- 342 27. MacKay, T. F. C., Stone, E. A. & Ayroles, J. F. The genetics of quantitative traits: Challenges  
343 and prospects. *Nature Reviews Genetics* **10**, 565–577 (2009).
- 344 28. Boyle, E. A., Li, Y. I. & Pritchard, J. K. An Expanded View of Complex Traits: From  
345 Polygenic to Omnigenic. *Cell* **169**, 1177–1186 (2017).
- 346 29. Wilfert, L. & Schmid-Hempel, P. The genetic architecture of susceptibility to parasites. *BMC*  
347 *Evol. Biol.* **8**, 187 (2008).
- 348 30. Wittwer, R. A., Dorn, B., Jossi, W. & Van Der Heijden, M. G. A. Cover crops support  
349 ecological intensification of arable cropping systems. *Sci. Rep.* **7**, 41911 (2017).
- 350 31. Finckh, M. R. *et al.* Cereal variety and species mixtures in practice, with emphasis on disease  
351 resistance. *Agronomie* **20**, 813–837 (2000).
- 352 32. Zhu, Y. *et al.* Genetic diversity and disease control in rice. *Nature* **406**, 718–722 (2000).

- 353 33. Litrico, I. & Violle, C. Diversity in Plant Breeding: A New Conceptual Framework. *Trends in*  
354 *Plant Science* **20**, 604–613 (2015).
- 355 34. Tilman, D., Cassman, K. G., Matson, P. A., Naylor, R. & Polasky, S. Agricultural  
356 sustainability and intensive production practices. *Nature* **418**, 671–677 (2002).
- 357 35. Edgerton, M. D. Increasing Crop Productivity to Meet Global Needs for Feed, Food, and  
358 Fuel. *Plant Physiol.* **149**, 7–13 (2009).
- 359 36. Lippman, Z. B. & Zamir, D. Heterosis: revisiting the magic. *Trends in Genetics* **23**, 60–66  
360 (2007).
- 361 37. Weiner, J., Du, Y. L., Zhang, C., Qin, X. L. & Li, F. M. Evolutionary agroecology: individual  
362 fitness and population yield in wheat (*Triticum aestivum*). *Ecology* **98**, 2261–2266 (2017).
- 363 38. Fitz, J. *et al.* personal communication.
- 364 39. Li, H. & Durbin, R. Fast and accurate short read alignment with Burrows – Wheeler  
365 transform. *Bioinformatics* **25**, 1754–1760 (2009).
- 366 40. Li, H. *et al.* The Sequence Alignment/Map format and SAMtools. *Bioinformatics* **25**, 2078–  
367 2079 (2009).
- 368 41. R Core Team. R: A Language and Environment for Statistical Computing. *R Foundation for*  
369 *Statistical Computing, Vienna, Austria* ISBN 3-900051-07-0 (2017). doi:[http://www.R-](http://www.R-project.org/)  
370 [project.org/](http://www.R-project.org/)
- 371 42. Xie, W. *et al.* Parent-independent genotyping for constructing an ultrahigh-density linkage  
372 map based on population sequencing. *Proc. Natl. Acad. Sci.* **107**, 10578–10583 (2010).
- 373 43. Hothorn, T., Bretz, F. & Westfall, P. Simultaneous inference in general parametric models.  
374 *Biometrical Journal* **50**, 346–363 (2008).  
375

## 376 **Acknowledgements**

377 We thank Bernhard Schmid and Ueli Grossniklaus for helpful discussions and generously sharing  
378 infrastructure and lab resources. We thank Jordi Bacompte for helpful comments on the manuscript.  
379 We further acknowledge Matthias Philipp for technical support, Enrica De Luca and Nicole Ponta  
380 for help with plant measurements, Matthias Furler and Dorde Topalovic for technical greenhouse  
381 support. This work was supported by an Ambizione Fellowship (PZ00P3\_148223) of the Swiss  
382 National Science Foundation (to S.E.W). P.A.N acknowledges support by the University of Zurich  
383 Priority Programme “Global Change and Biodiversity”. S.E.W was also financially supported by  
384 funds of the University of Zurich and the European Research Council (to Ueli Grossniklaus).

385

386 **Author contributions**

387 S.E.W. conceptualized and designed the research (with input from P.A.N.) and performed the  
388 experiments. Both authors performed the analyses and wrote the manuscript. Both authors read and  
389 approved the final version of the manuscript.

390

391 **Data availability**

392 The datasets described in the paper are available through the Zenodo data repository (DOI:XXX).

393 Sequencing data are deposited in the NCBI Short-Read Archive (accession XXX).

394 Analysis scripts are available from the authors upon request.

395

396 **Competing interests**

397 The authors declare no competing financial interests.

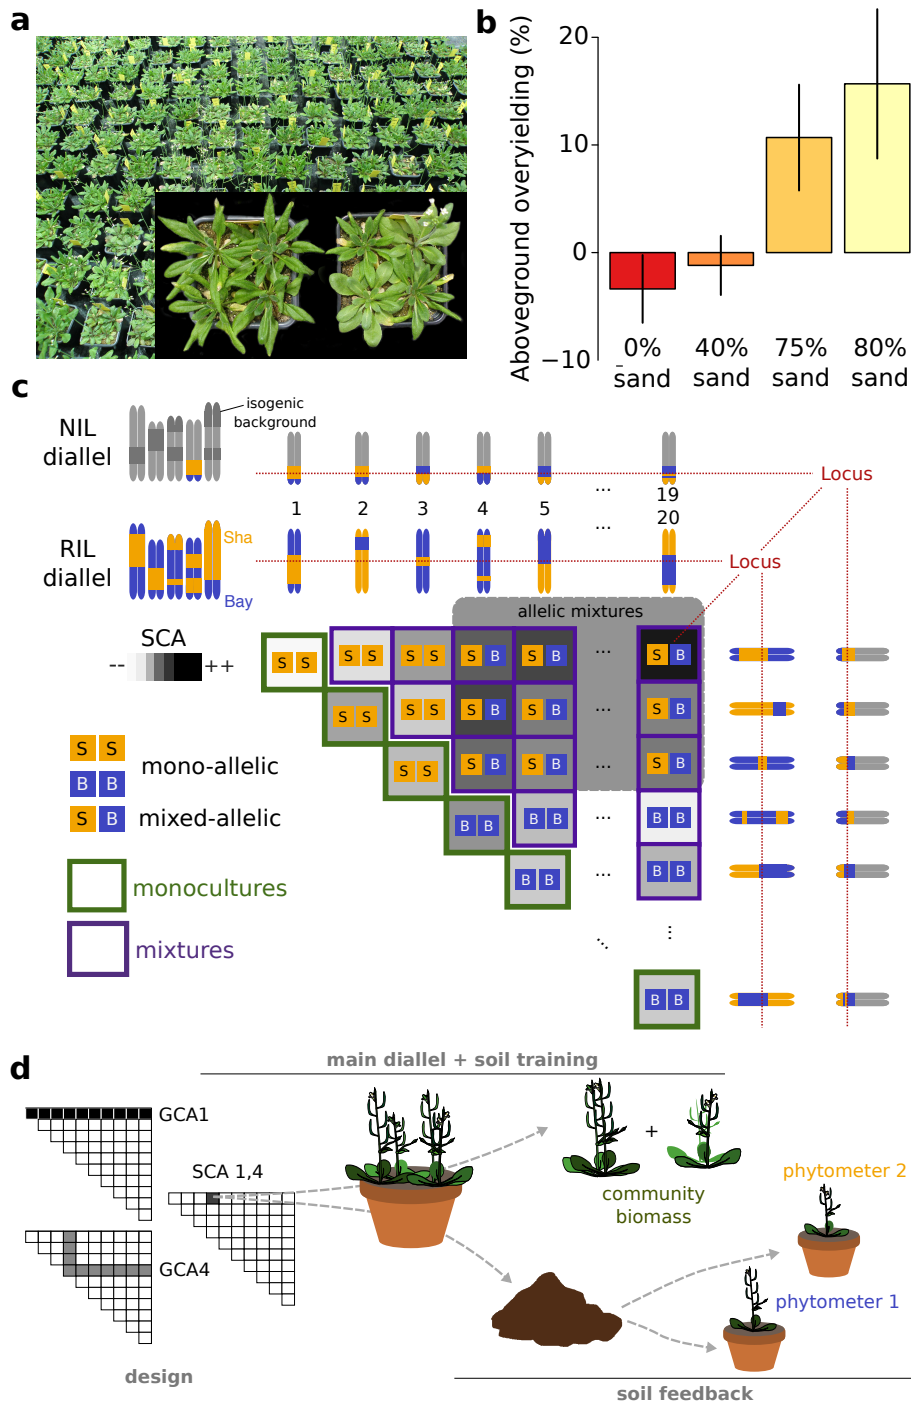

398 **Figure 1 | Combining ecological concepts and genetic methods.** **a**, Pot systems used to study  
 399 diversity effects in pair-wise genotype mixtures. The inset shows a Recombinant Inbred Line (RIL)  
 400 monoculture (left) and mixture (right). **b**, Net diversity effects in Bay-Sha mixtures along a peat-  
 401 sand substrate gradient. Error bars denote standard errors of means (s.e.m.). **c**, Outline of the  
 402 competition diallel design and the genotypes used throughout this paper. 18 RILs and the two  
 403 parental accession, or 19 near-isogenic lines (NILs) were each placed in competition with each

404 other, allowing to assess i) effects of genotypic mixture (i.e. diagonal vs off-diagonal), or ii) effects  
405 of allelic mixture at a given locus across all genotype mixtures (i.e. comparing SS and BB vs. SB)  
406 on pot productivity. **d**, Outline of the experimental procedure used in this work. Colored labels  
407 indicate measured variables. GCA = general combining ability; SCA = specific combining abilities.  
408

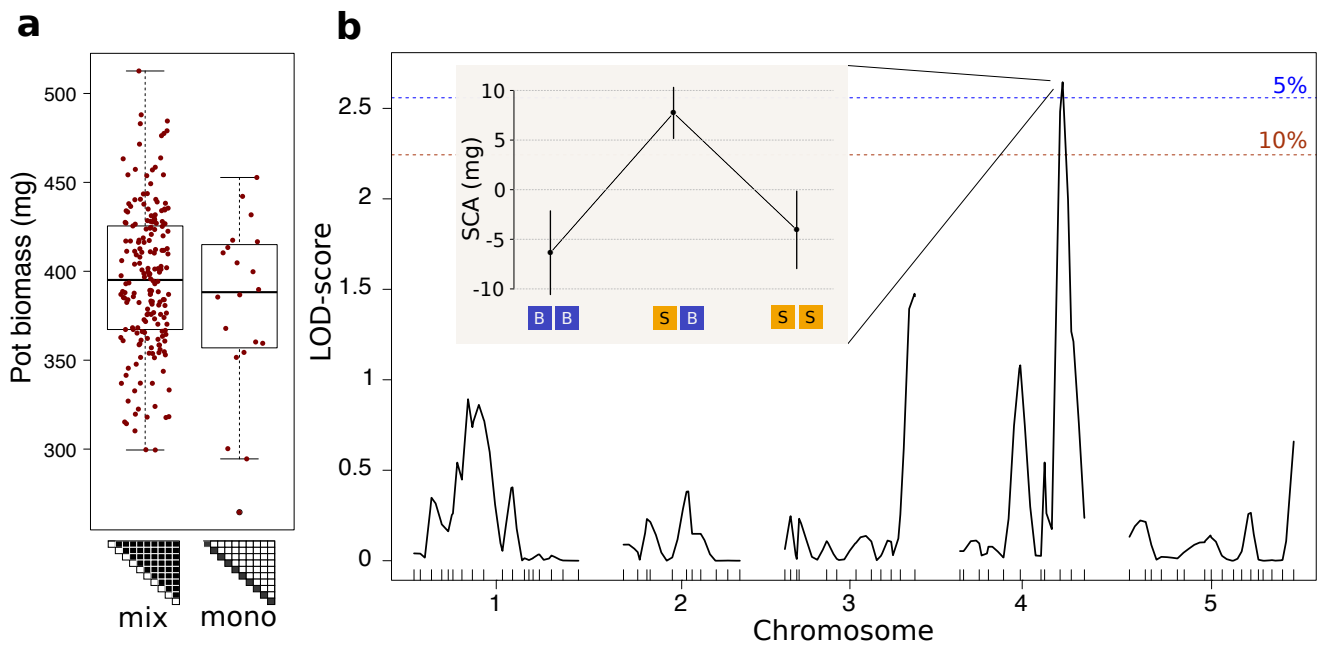

409 **Figure 2 | Allelic diversity at a major effect locus increases community productivity. a**, Pot-  
410 level productivity in dependence of community type (mix = RIL mixtures vs mono = RIL  
411 monocultures), showing positive genotype mixture effects in the diallel and on sand-rich soil  
412 (values aggregated across four blocks). **b**, Quantitative trait locus interval mapping of allelic  
413 diversity effects on specific combining ability (SCA). Vertical lines denote 10% and 5% genome-  
414 wide significance levels. The inset shows estimated SCA ( $\pm$  s.e.m.) across genotype mixtures that  
415 exhibit different allelic compositions at marker MSAT4.9 on chromosome four. LOD: logarithm of  
416 the odd.

417

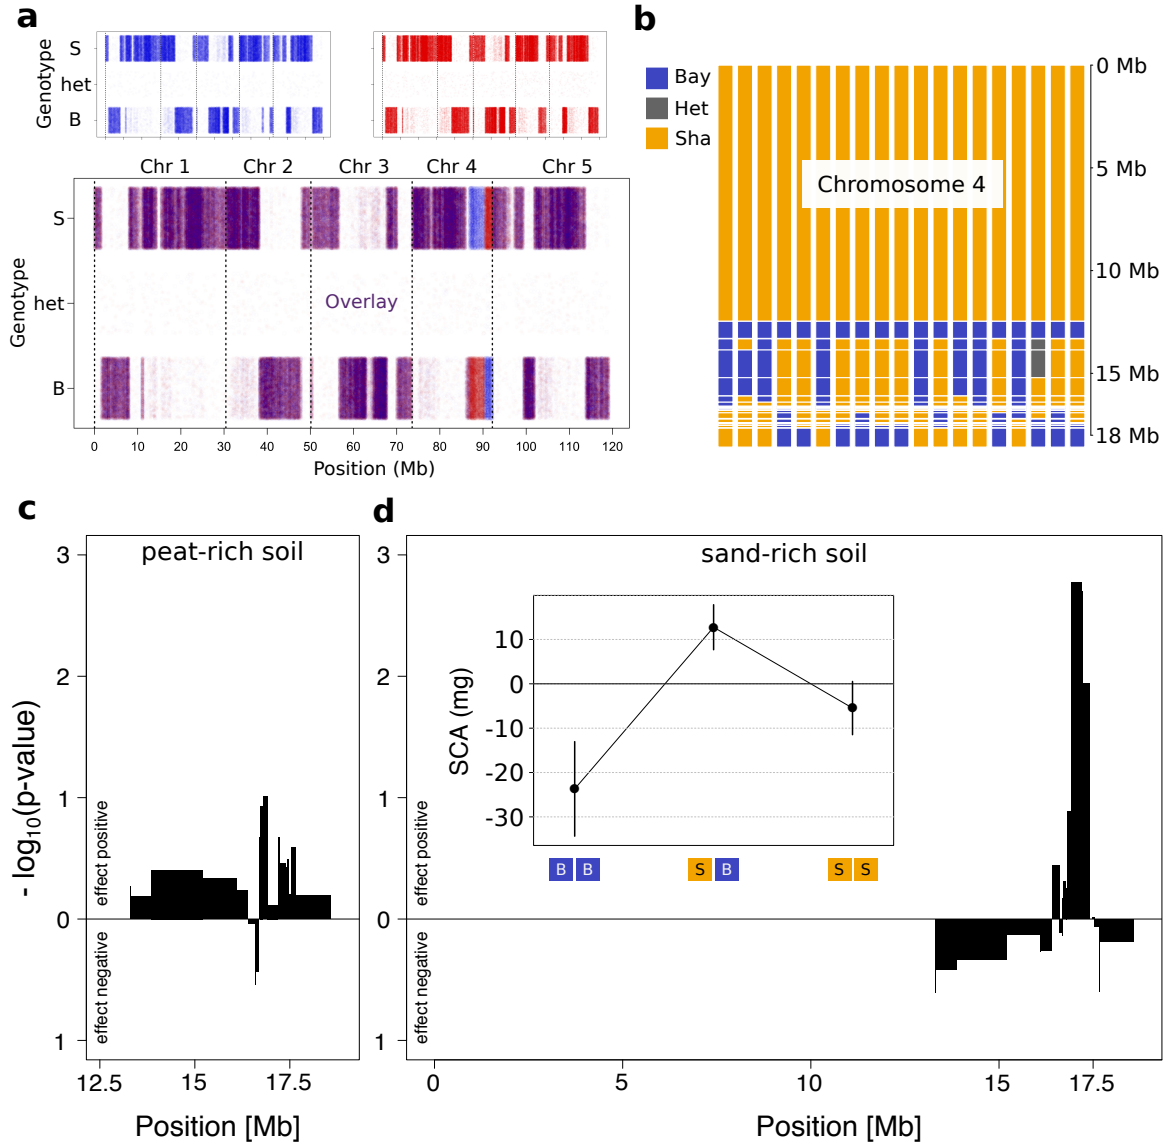

418 **Figure 3 | Resolving soil × allelic diversity interactions to a single Mendelian factor. a**, Re-  
 419 sequencing of near-isogenic lines (NILs) differing only on lower arm of chromosome four for fine-  
 420 mapping. Shown are genotype calls at all polymorphic sites across the genome (B = homozygous  
 421 for the Bay allele, het = heterozygous, S = Sha allele) in either NIL r10 (blue, top left) or NIL r96  
 422 (red, top right), as well as an overlay of the two line's genotype calls (bottom). **b**, Reconstructed  
 423 genotypes across chromosome four of the 19 NILs used for fine-mapping. Each bar represents a  
 424 single NIL. **c, d**, Map of allelic diversity effects across chromosome four, on either peat-rich soil  
 425 (c), or sand-rich soil (d). The widths of the bars indicate the size of the regions in which no



426 recombination events were inferred across the whole population. Inset in (d) shows the mean  $\pm$   
 427 s.e.m. of SCAs across allelic compositions at the diversity effect locus.

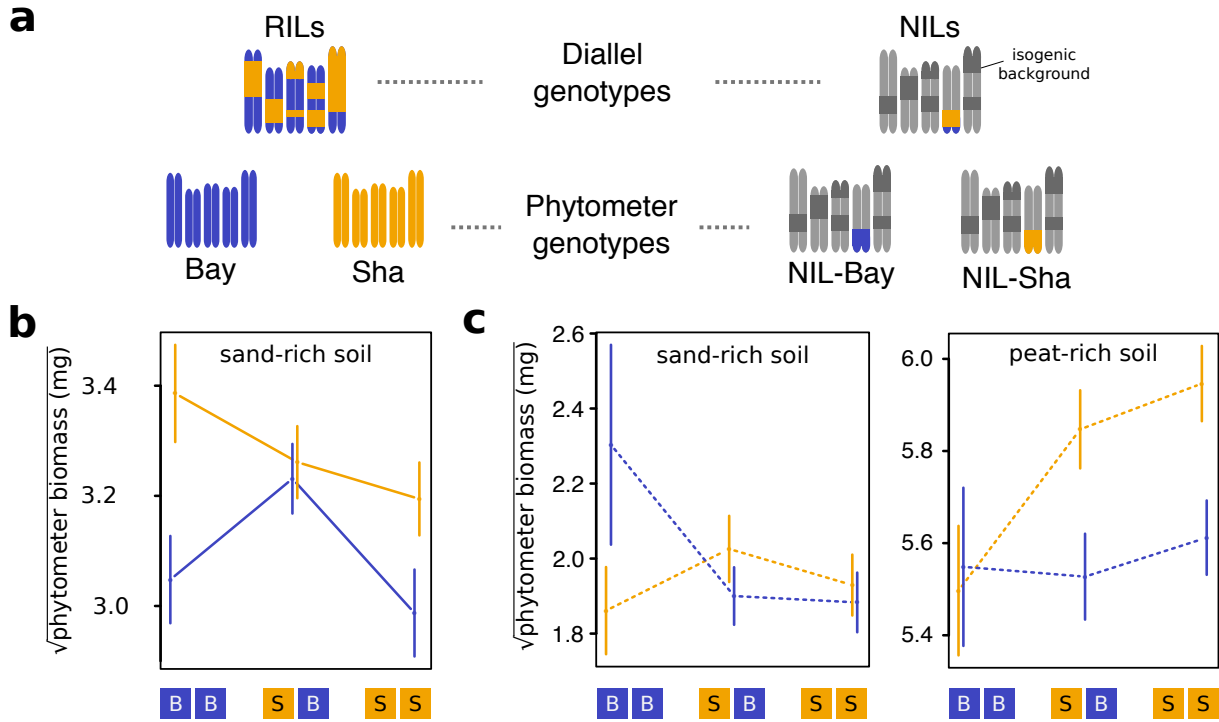

428 **Figure 4 | Allelic diversity effects persist across a generation through their soil legacy.** **a**,  
 429 Scheme of the genotype-combinations used for either the recombinant inbred lines (RILs) vs. near-  
 430 isogenic lines (NILs) diallels (top), and the phytometer genotypes used in the soil-feedback phase  
 431 (bottom). **b**, Mean phytometer (Bay or Sha,  $\pm$  s.e.m.) performances on legacy soil derived from  
 432 RIL mixtures with different allelic compositions at marker MSAT4.9. **c**, Mean phytometer (NIL-  
 433 Bay or NIL-Sha,  $\pm$  s.e.m.) performances on legacy soil derived from NIL mixtures with different  
 434 allelic compositions at locus Chr4@16.92 on either sand-rich (left) or peat-rich (right) soil. Values  
 435 were square-root transformed for analyses.

436

437 **Extended Data**

438 **Table S1 | Legacy effects of soils conditioned in RIL and NIL diallel experiments.** Effects were  
 439 quantified using two phytometers (factor ‘phy’; Sha and Bay accessions in RIL diallel, and near-



440 isogenic lines bearing Sha and Bay allele at putative effect locus in NIL diallel). The NIL diallel  
 441 additionally was replicated on substrates differing in sand content (factor ‘soil’). The term ‘GCA’  
 442 (general combining abilities) indicates average genotype-specific soil conditioning effects on  
 443 phytometer yields. ‘SCA’ (specific combining abilities) captures deviations in yield from additive  
 444 predictions made using GCAs. Within SCA, the following contrasts were tested: GD: Genotype  
 445 diversity, i.e. whether genotype monocultures differed in feedback effects from two-genotype  
 446 mixtures; A: allele-specific differences at marker MSAT4.9 (RIL diallel) and Chr4@16.92 (NIL  
 447 diallel) within genotype monocultures; AD: allele-diversity effects within genotype mixtures. df and  
 448 ddf indicate nominator and denominator degrees of freedom of corresponding F-tests. \*\*\* P<0.001;  
 449 \*\* P<0.01; \* P<0.05; (\*) P<0.1; n.s. not significant.

| Terms and contrasts     | RIL diallel |                  |         | NIL diallel |                        |         |
|-------------------------|-------------|------------------|---------|-------------|------------------------|---------|
|                         | df          | Denominator: ddf | Signif. | df          | Denominator: ddf       | Signif. |
| <b>GCA</b>              | 18          | comp: 167        | (*)     | 18          | comp: 168              | n.s.    |
| <b>SCA</b>              |             |                  |         |             |                        |         |
| <b>GD</b>               | 1           | comp: 167        | (*)     | 1           | comp: 168              | n.s.    |
| <b>A</b>                | 1           | comp: 167        | n.s.    | 1           | comp: 168              | n.s.    |
| <b>AD</b>               | 1           | comp: 167        | n.s.    | 1           | comp: 168              | n.s.    |
| <b>Phy × GCA</b>        | 18          | phy × comp: 166  | n.s.    | 18          | phy × comp: 168        | *       |
| <b>Phy × SCA</b>        |             |                  |         |             |                        |         |
| <b>Phy × GD</b>         | 1           | phy × comp: 166  | n.s.    | 1           | phy × comp: 168        | n.s.    |
| <b>Phy × A</b>          | 1           | phy × comp: 166  | n.s.    | 1           | phy × comp: 168        | n.s.    |
| <b>Phy × AD</b>         | 1           | phy × comp: 166  | **      | 1           | phy × comp: 168        | *       |
| <b>Soil × GCA</b>       |             |                  |         | 18          | soil × comp: 150       | n.s.    |
| <b>Soil × SCA</b>       |             |                  |         |             |                        |         |
| <b>Soil × GD</b>        |             |                  |         | 1           | soil × comp: 150       | n.s.    |
| <b>Soil × A</b>         |             |                  |         | 1           | soil × comp: 150       | n.s.    |
| <b>Soil × AD</b>        |             | does not apply   |         | 1           | soil × comp: 150       | n.s.    |
| <b>Phy × Soil × GCA</b> |             |                  |         | 18          | phy × soil × comp: 146 | n.s.    |
| <b>Phy × Soil × SCA</b> |             |                  |         |             |                        |         |
| <b>Phy × Soil × GD</b>  |             |                  |         | 1           | phy × soil × comp: 146 | ***     |
| <b>Phy × Soil × A</b>   |             |                  |         | 1           | phy × soil × comp: 146 | n.s.    |
| <b>Phy × Soil × AD</b>  |             |                  |         | 1           | phy × soil × comp: 146 | n.s.    |

451 **Table S2: PCR markers used in this study.**

| Primer | Assay  | Sequence                  | Predicted location | Pred. fragment sizes (Sha/Bay) |
|--------|--------|---------------------------|--------------------|--------------------------------|
| SW-182 | ShaBa5 | ACGTATTTTCGATGTATGGTCCTTG | Chr4: 16044156     | 550/664                        |
| SW-183 |        | TCACGTGAATCGTATTCGTTGAAG  |                    |                                |
| SW-184 | ShaBa6 | CTTCTCCGCTTCAACCTCTGC     | Chr4: 17709750     | 600/632                        |
| SW-185 |        | AATCCAGGATTCAGAGTTGCTTTC  |                    |                                |
| SW-188 | ShaBa8 | TTGATTAGGGCTACGAGGATAAGG  | Chr4: 16707214     | 408/609                        |
| SW-189 |        | GAGTCTATTAATTATGCTTGGTGC  |                    |                                |

452

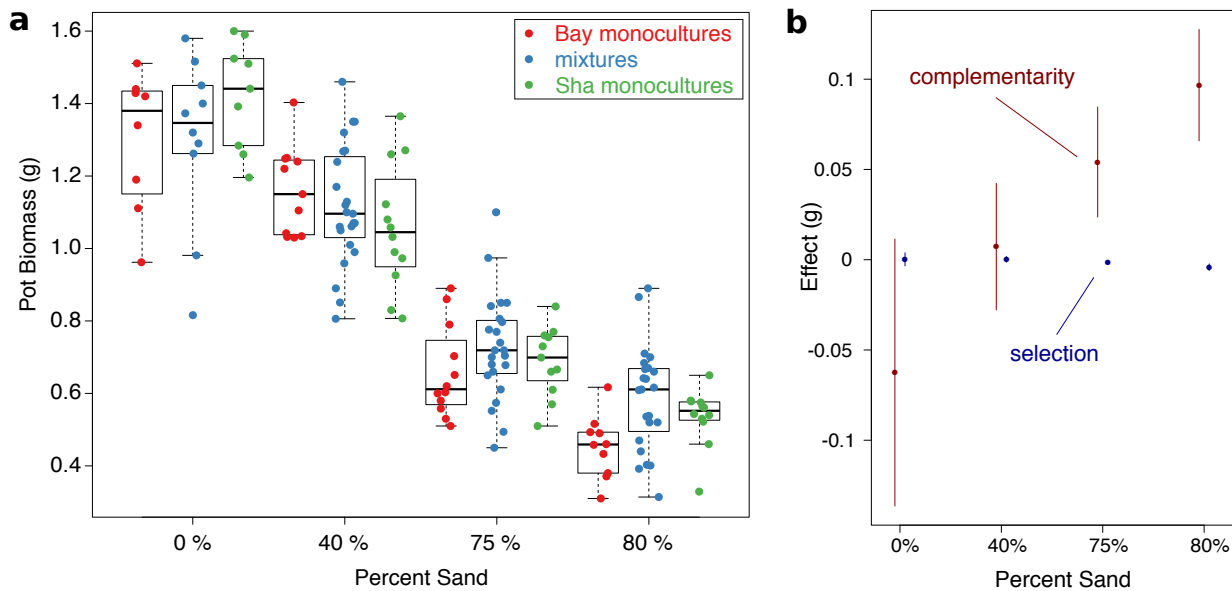

453 **Figure S1 | Productivity and complementarity in Bay-Sha mixtures across a peat-sand**  
 454 **gradient. a,** Pot-level biomass measurements of Sha and Bay monocultures or pair-wise mixtures  
 455 along a sand/peat substrate gradient. **b,** Complementarity and selection effects calculated according  
 456 to the additive partitioning<sup>8</sup> method along the substrate gradient. Error bars denote s.e.m.

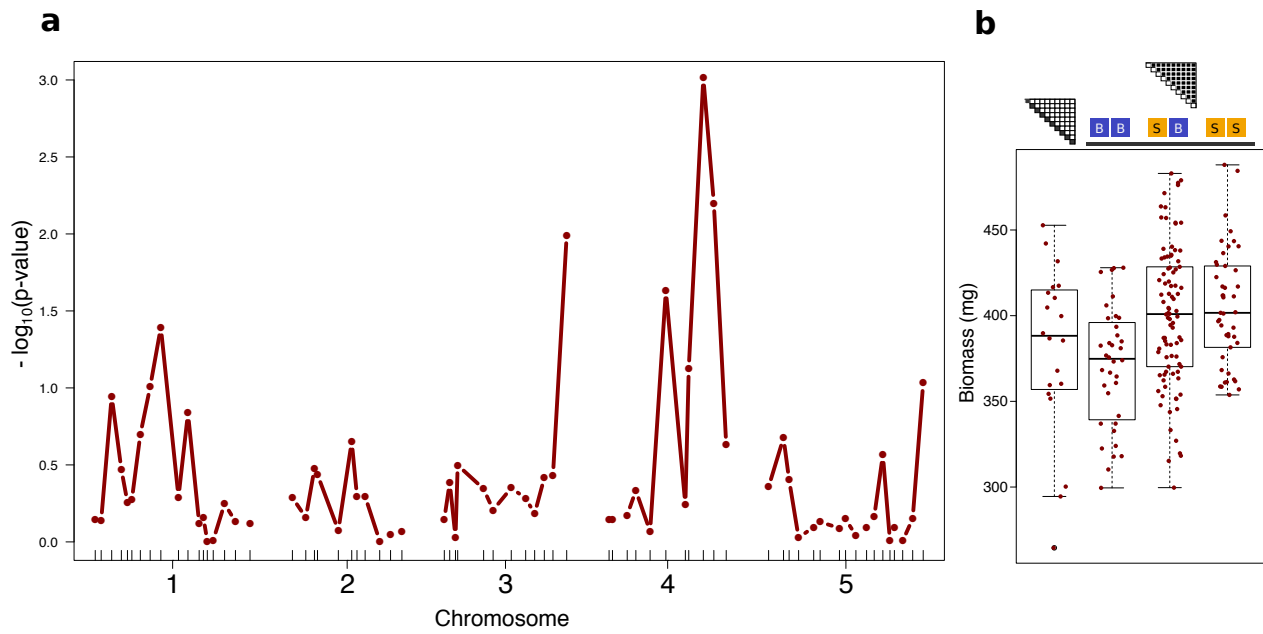

457 **Figure S2 | A major effect locus driving complementarity between genotypes.** **a**, QTL mapping  
458 of SCA variation across allelic diversity levels using a marker regression technique by contrasting  
459 SCAs of mono-allelic RIL mixtures (BB and SS) with bi-allelic mixtures (BS). **b**, Pot-level  
460 productivity of each genotype composition (average of four blocks) in dependence of allelic  
461 composition at marker MSAT4.9.

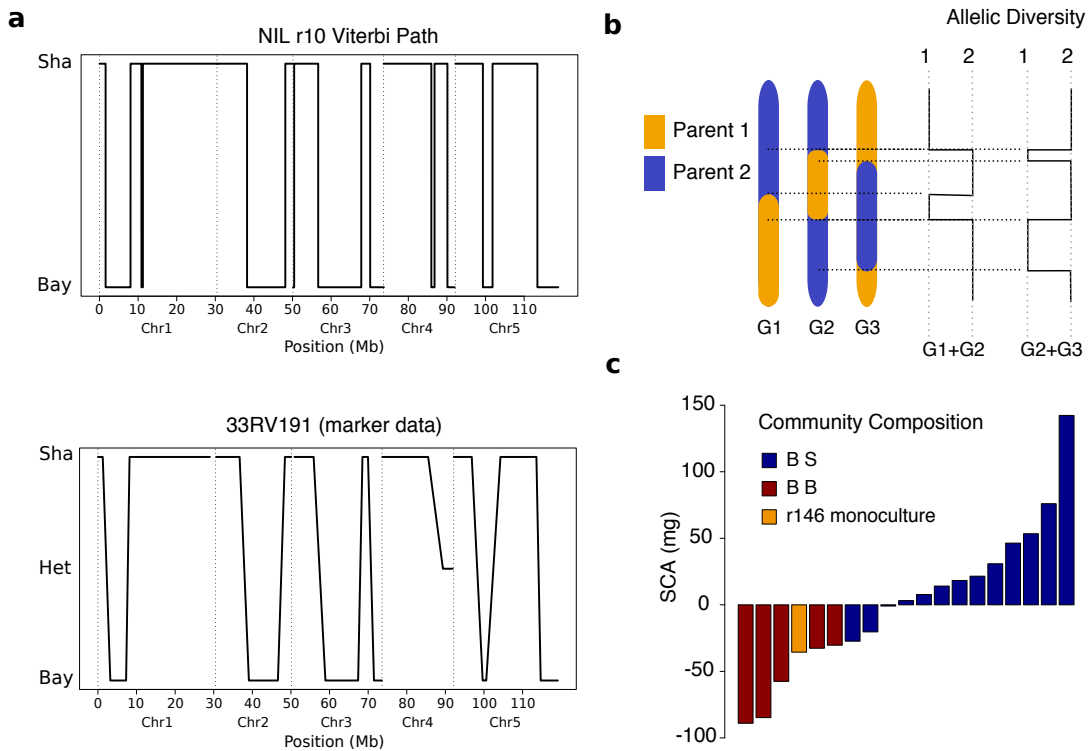

462 **Figure S3 | Fine-mapping and persistence of allelic diversity effects in near-isogenic line. a,**  
 463 The comparison of the reconstructed genotype of NIL r10 (HMM Viterbi-path across all  
 464 chromosomes, homozygous on lower arm of chromosome 4) in comparison to publicly available  
 465 molecular marker-based genotyping data of the ancestral line from which it was derived  
 466 (heterozygous on lower arm of chromosome 4) – showing a high degree of congruence between the  
 467 re-constructed genotype based on whole-genome resequencing and the marker data. **b,** Schematic  
 468 outline of a possible cause of the high mapping resolution achieved through the competition diallel  
 469 design. A major advantage of the design is the joint dependency of community-level allelic  
 470 diversity on recombinations *within* and *between* recombinant inbred lines, such that mapping  
 471 resolution increases very quickly. **c,** Extreme example of SCA variation across genotype mixtures  
 472 all containing one specific genotype (NIL r146, homozygous for the Bay-allele at locus  
 473 Chr4@16.92), either in combinations with NILs carrying the Sha-allele (dark blue bars) or the Bay-  
 474 allele (dark red bars). Shown are the data from sand-rich soil only.

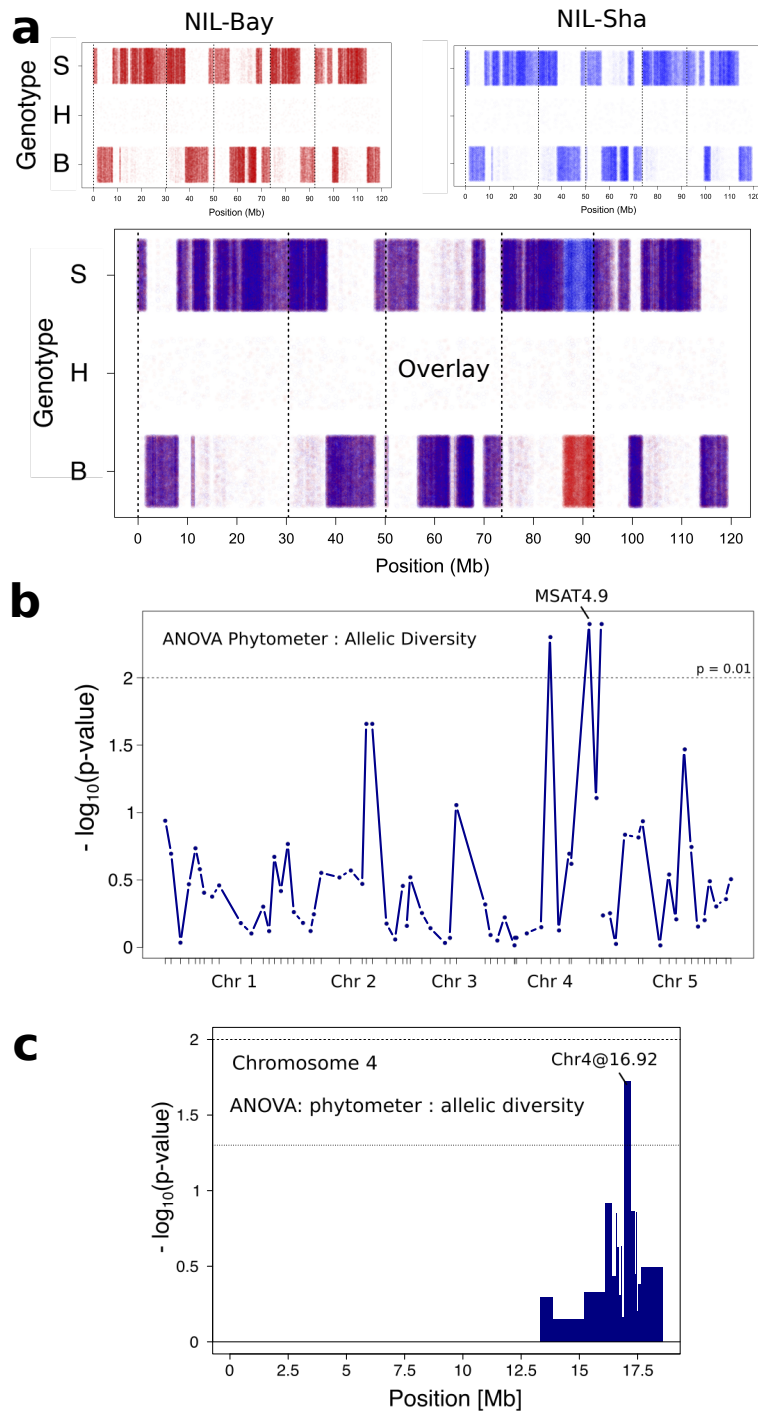

475 **Figure S4 | Soil-feedback experiments.** **a**, Genotype calls at all polymorphic sites across the  
476 genome (B = homozygous for the Bay allele, H = heterozygous, S = homozygous for the Sha allele)  
477 obtained by genome re-sequencing phytometer genotypes NIL-Bay (33RV191-Bay, top left, red)  
478 and NIL-Sha (33RV191-Sha, top right, blue). The overlay of the genotype calls of both lines  
479 (bottom) confirms that these lines are isogenic but for variation on lower arm of chromosome four.

480 The two phytometers were employed on soil derived from the NIL diallel. **b, c**, QTL mapping by  
481 marker regression of phytometer-specific responses to soil legacy of previous generation allelic  
482 diversity (i.e. allele-diversity  $\times$  phytometer [Phy $\times$ AD] interaction in Supplemental Table S1, but in a  
483 model without adjusting for diallel pot biomass). The mapping of diversity effects through such  
484 influences on soil legacy could have been applied to the identification and fine-mapping of the same  
485 major effect locus, without ever measuring biomass productivity (albeit with slightly relaxed  
486 statistical criteria). Shown are negative  $\log_{10}$ -transformed P-values for each marker position in the  
487 RIL (b) or genotype block in the NIL (c) diallels.

488

### 489 **Supplementary Discussion**

490 As outlined in Figures 1 and 4, and as described in the Methods, we performed two soil-feedback  
491 experiments to test whether allelic diversity effects extend across generations after the plants were  
492 destructively harvested. Possible effects solely explainable by variation in plant productivity during  
493 the soil training phase (e.g. nutrient draw-down or environmental correlations) were accounted for  
494 in the model (terms *diallel biomass* and *diallel biomass $\times$ soil* as described in the Methods section).  
495 Significantly different soil conditioning through allelic diversity, as assessed by phytometer  
496 performance in a next generation, can thus be seen as an “extended phenotype” (i.e. a legacy of  
497 allelic mixture that extends throughout generations), and interactions thereof with phytometer  
498 genotype as asymmetric responses (potential trade-offs) of phytometers to soil-borne factors  
499 affected by the conditioning (term “Phy $\times$ AD” in Supplemental Table S1).

500 We noticed, however, that the exact mechanisms underlying both soil training or phytometer  
501 responses await further experiments, since the response patterns (Fig. 4) do not allow for a simple  
502 mechanistic model. One problem that impedes the inference of underlying mechanisms (such as the  
503 anticipation of specific soil factors, and their interaction with genetic variants) is the number of  
504 variables that differed between the two experiments because of constraints on experimental design:

505 in the RIL diallel, we used the two parental accession Bay and Sha as phytometers and a split-plot  
506 design to test for differential responses of these phytometer to soil conditioning. After the NIL  
507 diallel, we used two near-isogenic phytometer (NIL-Bay and NIL-Sha) as phytometers in a similar  
508 test for differential responses to soil conditioning. Naively, we could expect an approximate  
509 congruence of how the different phytometers carrying the same alleles at the diversity locus  
510 responded in the two experiments, i.e. the parental genotype Bay in the RIL diallel (Figure 4 b,  
511 yellow lines) should exhibit approximately the same response pattern to allelic diversity legacy as  
512 the NIL-Bay genotype in the NIL diallel (Figure 4 c, yellow lines). However, it seems for example  
513 that the Bay genotype grown on RIL diallel soil responded somewhat positively to conditioning by  
514 allelic diversity (a pattern opposite to what would be expected from simple biomass-corresponding  
515 resource drawdown during the diallel experiment - and indicating that diversity led to the increased  
516 “removal” of a negatively acting soil factor, or the addition of a positively acting soil factor),  
517 whereas the NIL-Bay genotype in the NIL diallel responded somewhat negatively to conditioning  
518 by allelic diversity. Variables differing between the experiments were 1) the environment (e.g. the  
519 different dates at which the experiments were conducted, different batches of soil, greenhouse  
520 conditions, etc), 2) the genetic variation in the two diallel population (RILs vs NILs), whereby the  
521 genetic variance due to epistasis is expected to differ strongly between these two population, and 3)  
522 phytometer genotypes (parental lines vs NILs). We chose to vary the phytometer genotypes because  
523 i) we did not have NILs available for the RIL diallel, yet ii) aimed to demonstrate that asymmetric  
524 soil legacy responses could arise in a near-isogenic background in the NIL diallel.

525 All these differences between the two soil-feedback experiments, alone or in combination, may  
526 explain why our naive expectation (outlined above) was not met. However, the experiments still  
527 convincingly show that i) allelic diversity effect extend across generations through soil  
528 conditioning, and ii) phytometer genotype determines the response to such conditioning in either  
529 experiment (phytometer×allelic diversity interaction, see Table S1). Furthermore, both of these

530 arguments apply to the NIL experiments, where the population-level genetic variation (both in the  
531 training and feedback phase) was restricted to a single region in an otherwise isogenic background.  
532 This suggests that positive productivity effects and soil conditioning are related by mechanism.
